# Supplementary material for: Preparation of biocompatible and photostable PEGylated red fluorescent nanoparticles for cellular imaging
Source: Royal Society of Chemistry journal article supplement (doi:10.1039/c5py00929d), 2015-01-01
Supplement: c5py00929d1.pdf [file c5py00929d1.pdf]

## Electronic Supplementary Information (ESI)

### Preparation of biocompatible and photostable PEGylated red fluorescent nanoparticles for cellular imaging

Ke Wang,<sup>a</sup> Xiaoyong Zhang,<sup>a,b</sup> Xiqi Zhang,<sup>a</sup> Xingliang Fan,<sup>a</sup> Zengfang Huang,<sup>a</sup> Yi Chen,<sup>c</sup>  
Yen Wei<sup>\*a</sup>

<sup>a</sup> Department of Chemistry and Key Laboratory of Bioorganic Phosphorus Chemistry & Chemical Biology (Ministry of Education), Tsinghua University, Beijing, 100084, China. E-mail: wangke007@iccas.ac.cn, weiyen@tsinghua.edu.cn; Fax: +86(10)6277-1149; Tel: +86(10)6277-2674

<sup>b</sup> Department of Chemistry/Institute of Polymers, Nanchang University, 999 Xuefu Avenue, Nanchang, 330031, China

<sup>c</sup> Key Laboratory of Analytical Chemistry for Living Biosystems, Institute of Chemistry, Chinese Academy of Sciences, Beijing, 100190, China.

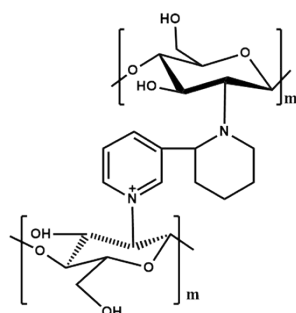

**Fig. S1** The new luminous structures generated from cross-linking of chitosan and glutaraldehyde.
